# Supplementary material
Source: PubMed Central journal article supplement (PMC8824360)
Supplement: mmc1.pdf [file mmc1.pdf]

# THE LANCET Psychiatry

## Supplementary appendix

This appendix formed part of the original submission and has been peer reviewed. We post it as supplied by the authors.

Supplement to: Racine N, Hetherington E, McArthur BA, et al. Maternal depressive and anxiety symptoms before and during the COVID-19 pandemic in Canada: a longitudinal analysis. *Lancet Psychiatry* 2021; published online Mar 24, 2021. [http://dx.doi.org/10.1016/S2215-0366\(21\)00074-2](http://dx.doi.org/10.1016/S2215-0366(21)00074-2).

**Supplemental Table 1. Missing data for associated variables at the COVID-19 wave.**

| <b>Associated Variable</b> | <b>Complete Cases, %(N)</b> | <b>Missing Cases, %(N)</b> | <b><math>\chi^2</math></b> | <b>p-value</b> |
|----------------------------|-----------------------------|----------------------------|----------------------------|----------------|
| Income (<80,000)           | 95.7 (1276/1333)            | 4.3 (57/1333)              | 1.97                       | 0.16           |
| Ethnicity                  | 99.5 (1326/1333)            | 0.5 (7/1333)               | 0.73                       | 0.39           |
| Healthcare worker          | 97.9 (1305/1333)            | 2.1 (28/1333)              | 3.75                       | 0.053          |
| Child under 5              | 97.1 (1294/1333)            | 2.9 (39/1333)              | 0.35                       | 0.56           |
| Single parent              | 97.1 (1295/1333)            | 2.9 (38/1333)              | 0.84                       | 0.36           |
| Income disruption          | 91.4 (1219/1333)            | 8.6 (114/1333)             | 0.71                       | 0.40           |
| Exposure to COVID-19       | 99.5 (1326/1333)            | 0.5 (7/1333)               | 0.72                       | 0.40           |
| Difficulty balancing       | 97.2 (1296/1333)            | 2.8 (37/1333)              | 3.04                       | 0.08           |
| Difficulty with childcare  | 96.9 (1292/1333)            | 3.1 (41/1333)              | 1.56                       | 0.21           |

Note: The  $\chi^2$  value is examining the difference in distribution of the associated variable based on whether there was complete (n=1,301) or not complete (n=32) outcome data available.

**Supplementary Table 2:** Baseline characteristics of AOF participants by whether they participated in the COVID-19 Impact Survey, unweighted analysis.

|                              | Responders (%)    | Non-Responders (%) |
|------------------------------|-------------------|--------------------|
| N                            | 1333 (100·0)      | 2054 (100·0)       |
| Age, years                   |                   |                    |
| <25                          | 76/1303 (5·80)    | 220/1978 (11·1)    |
| 25-34                        | 958/1303 (73·50)  | 1385/1978 (70·0)   |
| 35-44                        | 269/1303 (20·60)  | 373/1978 (18·90)   |
| Ethnicity                    |                   |                    |
| Asian                        | 148/1326 (11·20)  | 290/2026 (14·30)   |
| Black                        | 10/1326 (0·80)    | 40/2026 (2·0)      |
| First Nations, Inuit, Metis  | 7/1326 (0·50)     | 25/2026 (1·20)     |
| Latin                        | 20/1326 (1·50)    | 58/2026 (2·90)     |
| Other/Mixed                  | 39/1326 (2·90)    | 79/2026 (3·90)     |
| White                        | 1102/1326 (83·10) | 1534/2026 (75·70)  |
| Household income             |                   |                    |
| ≥\$80,000                    | 945/1277 (74·0)   | 1290/1973 (65·40)  |
| <\$79,999                    | 332/1277 (26·0)   | 683/1973 (34·60)   |
| Depression score* (mean, SD) | 4·81±4·14         | 5·73±4·62          |
| Anxiety score* (mean, SD)    | 30·41±8·41        | 31·83±9·25         |

Note: Raw data is presented with no corrective weights applied. Depression was measured using the Edinburgh Postnatal Depression Scale. Anxiety was measured using the Spielberger State-Trait Anxiety Inventory.

**Supplementary Table 3:** Characteristics of AOF participants prior to and after the application of the inverse probability weights.

|                             | Baseline<br>% (N) | 3yr<br>Unweighted<br>% (N) | 3 yr Weighted<br>% | 5 yr<br>Unweighted<br>% (N) | 5 yr Weighted<br>% | 8 yr<br>Unweighted<br>% (N) | 8 yr Weighted<br>% | COVID<br>Unweighted<br>% (N) | COVID<br>Weighted<br>% |
|-----------------------------|-------------------|----------------------------|--------------------|-----------------------------|--------------------|-----------------------------|--------------------|------------------------------|------------------------|
| Income                      |                   |                            |                    |                             |                    |                             |                    |                              |                        |
| ≤59,999                     | 18·43 (607)       | 13·99 (273)                | 18·13              | 13·67 (266)                 | 18·12              | 14·68 (297)                 | 18·13              | 13·51 (176)                  | 17·67                  |
| ≥60,000                     | 81·57 (2687)      | 86·01 (1678)               | 81·87              | 86·33 (1680)                | 81·88              | 85·32 (1726)                | 81·87              | 86·49 (1127)                 | 82·33                  |
| Education                   |                   |                            |                    |                             |                    |                             |                    |                              |                        |
| Some elementary/high school | 3·54 (119)        | 2·31 (46)                  | 3·57               | 1·76 (35)                   | 3·57               | 2·17 (45)                   | 3·41               | 1·35 (18)                    | 3·16                   |
| Graduated High School       | 7·43 (250)        | 5·92 (118)                 | 7·45               | 5·68 (113)                  | 7·37               | 6·04 (125)                  | 7·51               | 4·96 (66)                    | 7·46                   |
| Some post-secondary         | 14·32 (482)       | 12·44 (248)                | 14·36              | 13·07 (260)                 | 14·37              | 13·19 (273)                 | 14·26              | 13·08 (174)                  | 14·40                  |
| Graduate post-secondary     | 58·93 (1983)      | 62·87 (1253)               | 59·04              | 63·25 (1258)                | 59·12              | 62·95 (1303)                | 59·16              | 64·44 (857)                  | 59·42                  |
| Some graduate school        | 2·67 (90)         | 2·56 (51)                  | 2·70               | 2·61 (52)                   | 2·70               | 2·56 (53)                   | 2·67               | 2·63 (35)                    | 2·70                   |
| Completed graduate school   | 13·11 (441)       | 13·90 (277)                | 12·88              | 13·62 (271)                 | 12·87              | 13·09 (271)                 | 12·98              | 13·53 (180)                  | 12·85                  |
| Ethnicity                   |                   |                            |                    |                             |                    |                             |                    |                              |                        |
| Asian                       | 13·07 (438)       | 11·45 (227)                | 12·58              | 11·81 (234)                 | 12·65              | 12·17 (251)                 | 12·71              | 11·16 (148)                  | 12·59                  |
| Black                       | 1·49 (50)         | 1·21 (24)                  | 1·43               | 1·21 (24)                   | 1·37               | 1·21 (25)                   | 1·40               | 0·75 (10)                    | 1·18                   |
| First Nation, Inuit, Metis  | 1·0 (32)          | 0·45 (9)                   | 1·0                | 0·50 (10)                   | 0·08               | 0·68 (14)                   | 0·08               | 0·53 (7)                     | 0·09                   |
| Latin                       | 2·33 (78)         | 1·51 (30)                  | 2·44               | 1·51 (30)                   | 2·44               | 1·70 (35)                   | 2·34               | 1·51 (20)                    | 2·09                   |
| Mixed/Other                 | 3·52 (118)        | 3·08 (61)                  | 3·43               | 3·03 (60)                   | 3·55               | 3·49 (72)                   | 3·49               | 2·94 (39)                    | 3·55                   |
| White                       | 78·64 (2636)      | 82·29 (1631)               | 79·27              | 81·93 (1623)                | 79·21              | 80·75 (1655)                | 79·22              | 83·11 (1102)                 | 79·69                  |

Note: Inverse probability weights were estimated for each time point (i.e., 3,5, and 8-years, and COVID-19 wave) using methods described by Seaman & White (1). The probability of being a responder at each wave was calculated using logistic regression. Demographic and baseline mental health variables were considered as potential predictors of being a responder. Maternal age, income, education, ethnicity and baseline depression and baseline anxiety scores were included. Weights were calculated as 1/the predicted probability of participation and trimmed at the 0.05 and 99.5 percentiles to reduce variability due to outliers. Application of weights at each time point (i.e., 3, 5, 8 years, and COVID-19 wave) restored the proportion of individuals in each category to the baseline estimate.

**Supplemental Table 4. Cross-sectional unweighted means and 95% CIs of mental health difficulties scores only for mothers who responded to the COVID-19 Impact Survey (n=1333).**

| Variable           | 3 yr (April 2012-Oct· 2014)<br>n=1138 | 5yr (April 2014-Oct· 2016)<br>n=1205 | 8yr (Feb 2017-Oct· 2019)<br>n=1297 | COVID-19 (May 20 <sup>th</sup> - July 15 <sup>th</sup> , 2020) n=1333 |
|--------------------|---------------------------------------|--------------------------------------|------------------------------------|-----------------------------------------------------------------------|
| <b>Depression</b>  |                                       |                                      |                                    |                                                                       |
| Overall            | 4·73 (4·49-4·97)                      | 5·16 (4·89-5·42)                     | 5·43 (5·18-5·69)                   | 8·06 (7·75-8·38)                                                      |
| Missing, N(%)      | 196/1333 (14·7)                       | 145/1333 (10·9)                      | 83/1333 (6·2)                      | 49/1333 (3·7)                                                         |
| <b>Age (years)</b> |                                       |                                      |                                    |                                                                       |
| <25                | 7·14 (2·35-11·93)                     | 10·00 (-15·41-35·41)                 | -                                  | -                                                                     |
| 25-34              | 4·68 (4·33-5·03)                      | 4·98 (4·53-5·44)                     | 6·65 (5·76-7·54)                   | 8·57 (7·00-10·14)                                                     |
| 35-44              | 4·79 (4·44-5·14)                      | 5·24 (4·91-5·58)                     | 5·28 (4·99-5·58)                   | 8·06 (7·67-8·45)                                                      |
| 45-54              | 4·22 (2·27-6·18)                      | 5·51 (4·02-7·00)                     | 5·44 (4·71-6·18)                   | 8·00 (7·41-8·61)                                                      |
| <b>Income</b>      |                                       |                                      |                                    |                                                                       |
| ≤\$79,999          | 5·68 (5·09,6·28)                      | 6·87 (6·10-7·64)                     | 6·71 (5·99-7·42)                   | 9·01 (8·16-9·86)                                                      |
| >\$80,000          | 4·47 (4·20-4·73)                      | 4·82 (4·54-5·09)                     | 5·17 (4·90-5·45)                   | 7·89 (7·55-8·23)                                                      |
| <b>Anxiety</b>     |                                       |                                      |                                    |                                                                       |
| Overall            | 9·27 (9·08-9·46)                      | 9·30 (9·11-9·49)                     | 10·14 (9·94-10·33)                 | 11·76 (11·54-11·98)                                                   |
| Missing, N(%)      | 197/1333 (14·8)                       | 143/1333 (10·7)                      | 62/1333 (4·7)                      | 43 (3·2)                                                              |
| <b>Age (years)</b> |                                       |                                      |                                    |                                                                       |
| <25                | 9·86 (6·96-12·75)                     | 11·00 (-1·71-23·71)                  | -                                  | -                                                                     |
| 25-34              | 9·13 (8·87-9·40)                      | 9·12 (8·81-9·43)                     | 9·98 (9·36-10·60)                  | 12·23 (11·14-13·31)                                                   |
| 35-44              | 9·46 (9·17-9·74)                      | 9·39 (9·15-9·63)                     | 10·21 (9·98-10·44)                 | 11·70 (11·44-11·97)                                                   |
| 45-54              | 7·94 (6·94-8·95)                      | 9·79 (8·66-10·93)                    | 10·00 (9·49-10·51)                 | 11·78 (11·32-12·23)                                                   |
| <b>Income</b>      |                                       |                                      |                                    |                                                                       |
| ≤\$79,999          | 9·94 (9·50-10·39)                     | 9·89 (9·40-10·37)                    | 10·94 (10·41-11·47)                | 12·26 (11·65-12·86)                                                   |
| >\$80,000          | 9·10 (8·89-9·31)                      | 9·18 (8·98-9·38)                     | 9·98 (9·77-10·18)                  | 11·64 (11·40-11·88)                                                   |

**Supplemental Table 5. Cross-sectional unweighted proportions and 95% CIs of mental health difficulties scores only for mothers who responded to the COVID-19 Impact Survey (n=1333).**

| Variable           | 3 yr (April 2012-Oct· 2014)<br>n=1138 | 5yr (April 2014-Oct· 2016)<br>n=1205 | 8yr (Feb 2017-Oct· 2019)<br>n=1297 | COVID-19 (May 20 <sup>th</sup> - July 15 <sup>th</sup> , 2020) n=1333 |
|--------------------|---------------------------------------|--------------------------------------|------------------------------------|-----------------------------------------------------------------------|
| <b>Depression</b>  |                                       |                                      |                                    |                                                                       |
| Overall            | 12·14 (10·36, 14·17)                  | 14·98 (13·06, 17·13)                 | 16·80 (14·83, 18·98)               | 33·57 (31·03, 36·20)                                                  |
| Missing, N(%)      | 196/1333 (14·7)                       | 145/1333 (10·9)                      | 83/1333 (6·2)                      | 49/1333 (3·7)                                                         |
| <b>Age (years)</b> |                                       |                                      |                                    |                                                                       |
| <25                | 28·57 (7·19, 67·38)                   | 50·00 (5·87, 94·13)                  | -                                  | -                                                                     |
| 25-34              | 12·57 (10·06, 15·59)                  | 14·52 (11·29, 18·48)                 | 26·28 (19·59, 34·28)               | 38·10 (27·00, 50·59)                                                  |
| 35-44              | 11·30 (8·89, 14·26)                   | 15·09 (12·72, 17·82)                 | 15·45 (13·25, 17·94)               | 32·95 (29·90, 36·15)                                                  |
| 45-54              | 22·22 (8·59, 46·50)                   | 17·95 (8·80, 33·16)                  | 17·44 (12·47, 23·86)               | 35·09 (30·07, 40·47)                                                  |
| <b>Income</b>      |                                       |                                      |                                    |                                                                       |
| ≤\$79,999          | 18·42 (13·90, 24·00)                  | 24·38 (18·93, 30·79)                 | 22·97 (17·76, 29·16)               | 39·58 (32·91, 46·67)                                                  |
| >\$80,000          | 10·46 (8·62, 12·63)                   | 13·15 (11·17, 15·42)                 | 15·53 (13·43, 17·88)               | 32·46 (29·70, 35·33)                                                  |
| <b>Anxiety</b>     |                                       |                                      |                                    |                                                                       |
| Overall            | 10·92 (9·23, 12·87)                   | 10·59 (8·96, 12·47)                  | 18·17 (16·15, 20·39)               | 30·16 (27·71, 32·72)                                                  |
| Missing, N(%)      | 197/1333 (14·8)                       | 143/1333 (10·7)                      | 62/1333 (4·7)                      | 43 (3·2)                                                              |
| <b>Age (years)</b> |                                       |                                      |                                    |                                                                       |
| <25                | 14·29 (1·96, 58·12)                   | -                                    | -                                  | -                                                                     |
| 25-34              | 10·41 (8·13, 13·24)                   | 8·89 (6·39, 12·25)                   | 17·14 (11·76, 24·31)               | 35·48 (24·63, 48·07)                                                  |
| 35-44              | 11·48 (9·05, 14·46)                   | 11·37 (9·31, 13·83)                  | 19·10 (16·70, 21·75)               | 29·03 (26·11, 32·13)                                                  |
| 45-54              | -                                     | 15·38 (7·07, 30·28)                  | 14·20 (9·78, 20·18)                | 31·15 (26·32, 36·43)                                                  |
| <b>Income</b>      |                                       |                                      |                                    |                                                                       |
| ≤\$79,999          | 15·86 (11·66, 21·21)                  | 13·30 (9·28, 18·71)                  | 26·54 (21·02, 32·91)               | 32·98 (26·68, 39·96)                                                  |
| >\$80,000          | 9·57 (7·81, 11·67)                    | 9·99 (8·26, 12·03)                   | 16·40 (14·27, 18·77)               | 29·14 (26·48, 31·94)                                                  |

**Supplemental Table 6: Bivariate and multivariable fixed-effects regression estimates**

| Variable                                | Unadjusted Estimates |         |                         |         | Adjusted Estimates*  |         |                          |         |
|-----------------------------------------|----------------------|---------|-------------------------|---------|----------------------|---------|--------------------------|---------|
|                                         | Depression (95% CI)  | p-value | Anxiety (95% CI)        | p-value | Depression (95% CI)  | p-value | Anxiety (95% CI)         | p-value |
| Linear Time Trend                       | 0·01 (0·006, 0·014)  | <0·0001 | -0·008(-0·02, 0·01)     | 0·30    | 0·01 (0·005, 0·014)  | <0·0001 | -0·01 (-0·02, 0·01)      | 0·472   |
| Squared Time Trend                      | -                    | -       | 0·0002 (0·00007,0·0004) | 0·004   | -                    | -       | 0·0002 (0·00004, 0·0003) | 0·010   |
| Change at COVID                         | 2·30 (1·95, 2·65)    | <0·0001 | 1·04 (0·65, 1·43)       | <0·0001 | 0·47 (-0·22, 1·16)   | 0·177   | -0·34 (-0·89, 0·22)      | 0·348   |
| Household income before COVID-19        | -0·23 (-1·00, 0·54)  | 0·563   | 0·06 (-0·51, 0·63)      | 0·836   | -                    | -       | -                        | -       |
| Single parent                           | -0·09 (-1·23, 1·05)  | 0·873   | 0·30 (-0·56, 1·16)      | 0·498   | -                    | -       | -                        | -       |
| Children < 5 years                      | 0·31 (-0·52, 1·14)   | 0·462   | -0·05 (-0·68, 0·57)     | 0·868   | -                    | -       | -                        | -       |
| Ethnic minority                         | -0·51 (-1·19, 0·18)  | 0·145   | -0·79 (-1·33, -0·24)    | 0·005   | -                    | -       | -0·66 (-1·17, -0·14)     | 0·027   |
| Impact of COVID-19 on income/employment | 0·88 (0·36, 1·40)    | 0·001   | 0·78 (0·37, 1·19)       | <0·0001 | 0·86 (0·34, 1·39)    | 0·001   | 0·79 (0·41, 1·17)        | <0·0001 |
| Healthcare worker                       | -0·73 (-1·33, -0·13) | 0·017   | 0·00 (-0·47, 0·47)      | 0·999   | -0·81 (-1·45, -0·18) | 0·011   | -                        | -       |
| Difficulty balancing                    | 1·77 (1·17, 2·37)    | <0·0001 | 1·23 (0·77, 1·68)       | <0·0001 | 1·57 (0·91, 2·23)    | <0·0001 | 1·09 (0·65, 1·54)        | <0·0001 |
| Difficulty obtaining childcare          | 1·10 (0·50, 1·69)    | <0·0001 | 0·78 (0·32, 1·24)       | 0·001   | 0·91 (0·27, 1·55)    | 0·005   | 0·55 (0·09, 1·01)        | 0·052   |
| History of mental illness               | 0·05 (-0·50, 0·60)   | 0·847   | -0·02 (-0·46, 0·41)     | 0·922   | -                    | -       | -                        | -       |

\*Adjusted for significant factors at the  $p < 0.05$  level in the unadjusted analysis.

Note: A linear time trend was used for depression, whereas linear and quadratic time trends were used for the anxiety models.



**Supplemental Table 7: Depression and Anxiety Symptom Mean Scores and Proportions at the COVID-19 Wave for Mothers with Only Children Versus Mothers with Multiple Children.**

| Variable            | N (%)            | Mean depression (95%CI) | Mean anxiety (95%CI) | Proportion with significant depression (95%CI) | Proportion with significant anxiety (95%CI) |
|---------------------|------------------|-------------------------|----------------------|------------------------------------------------|---------------------------------------------|
| Only Child          | 155/1333 (11.7)  | 8.14 (7.14-9.15)        | 11.62 (10.89-12.35)  | 30.07 (22.80-37.34)                            | 30.77 (23.53-38.01)                         |
| More than one child | 1138/1333 (85.4) | 8.03 (7.70-8.36)        | 11.75 (11.51-11.98)  | 33.90 (31.13-36.67)                            | 29.63 (26.95-32.30)                         |
| Missing             | 39/1333 (2.9)    | -                       | -                    | -                                              | -                                           |

Note. Unweighted raw scores are presented here.

**Supplemental Figure 1. Weighted means and 95% confidence intervals for depressive and anxiety symptoms over time.**

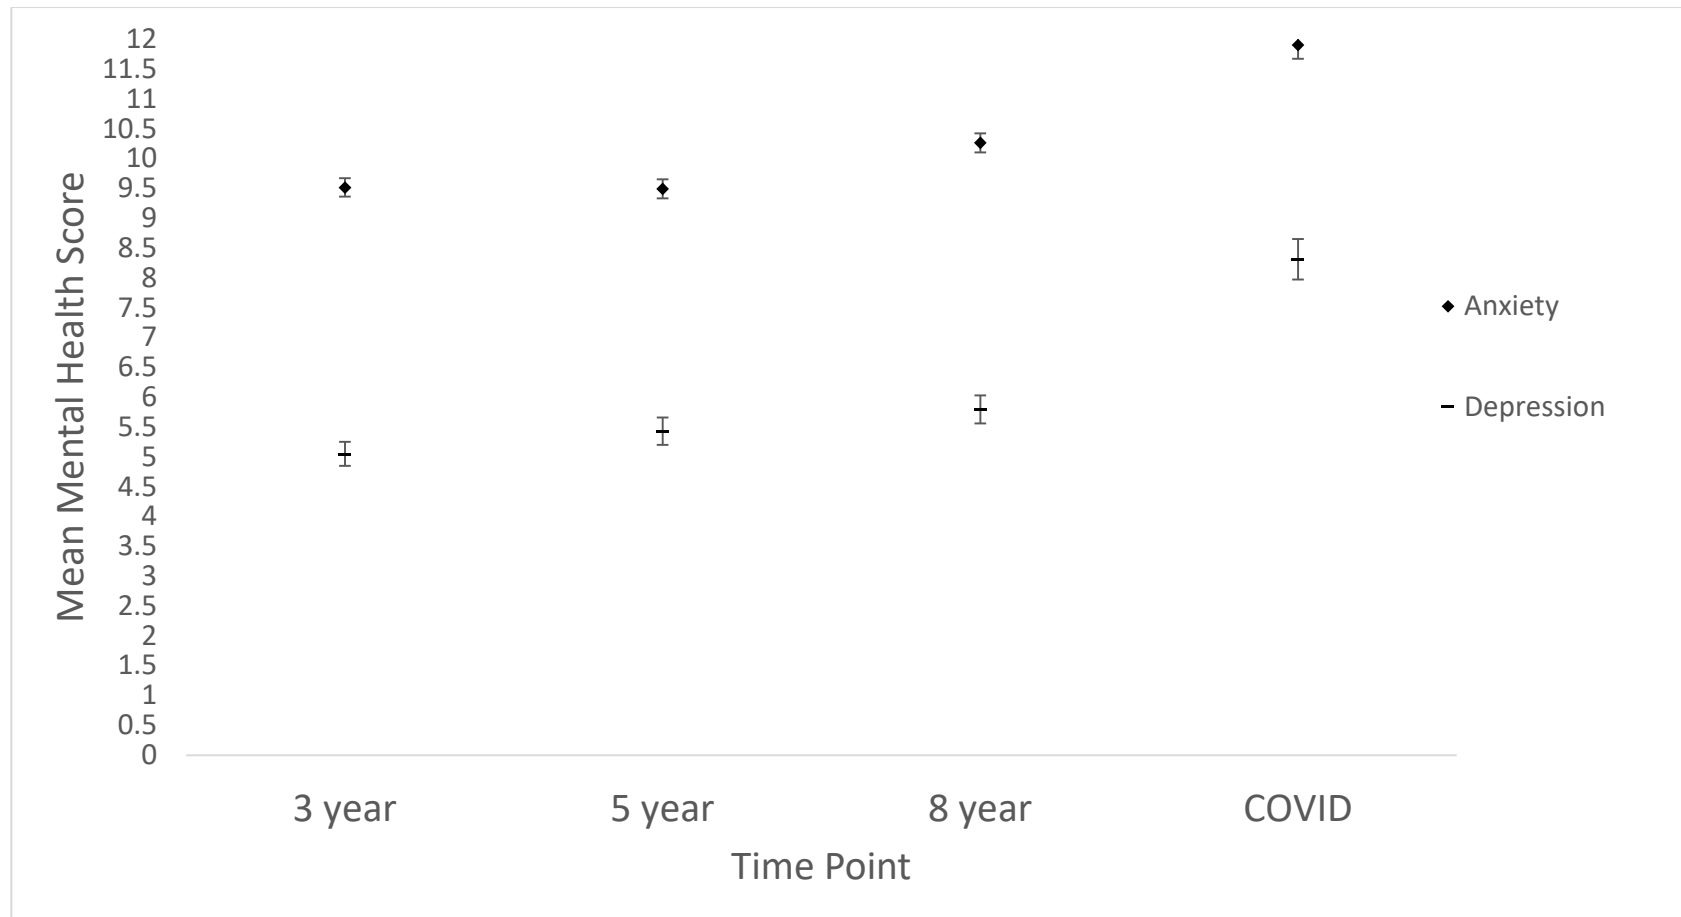

**Supplemental Figure 2. Weighted proportions and 95% confidence intervals for mothers reporting clinically significant depression and anxiety scores over time.**

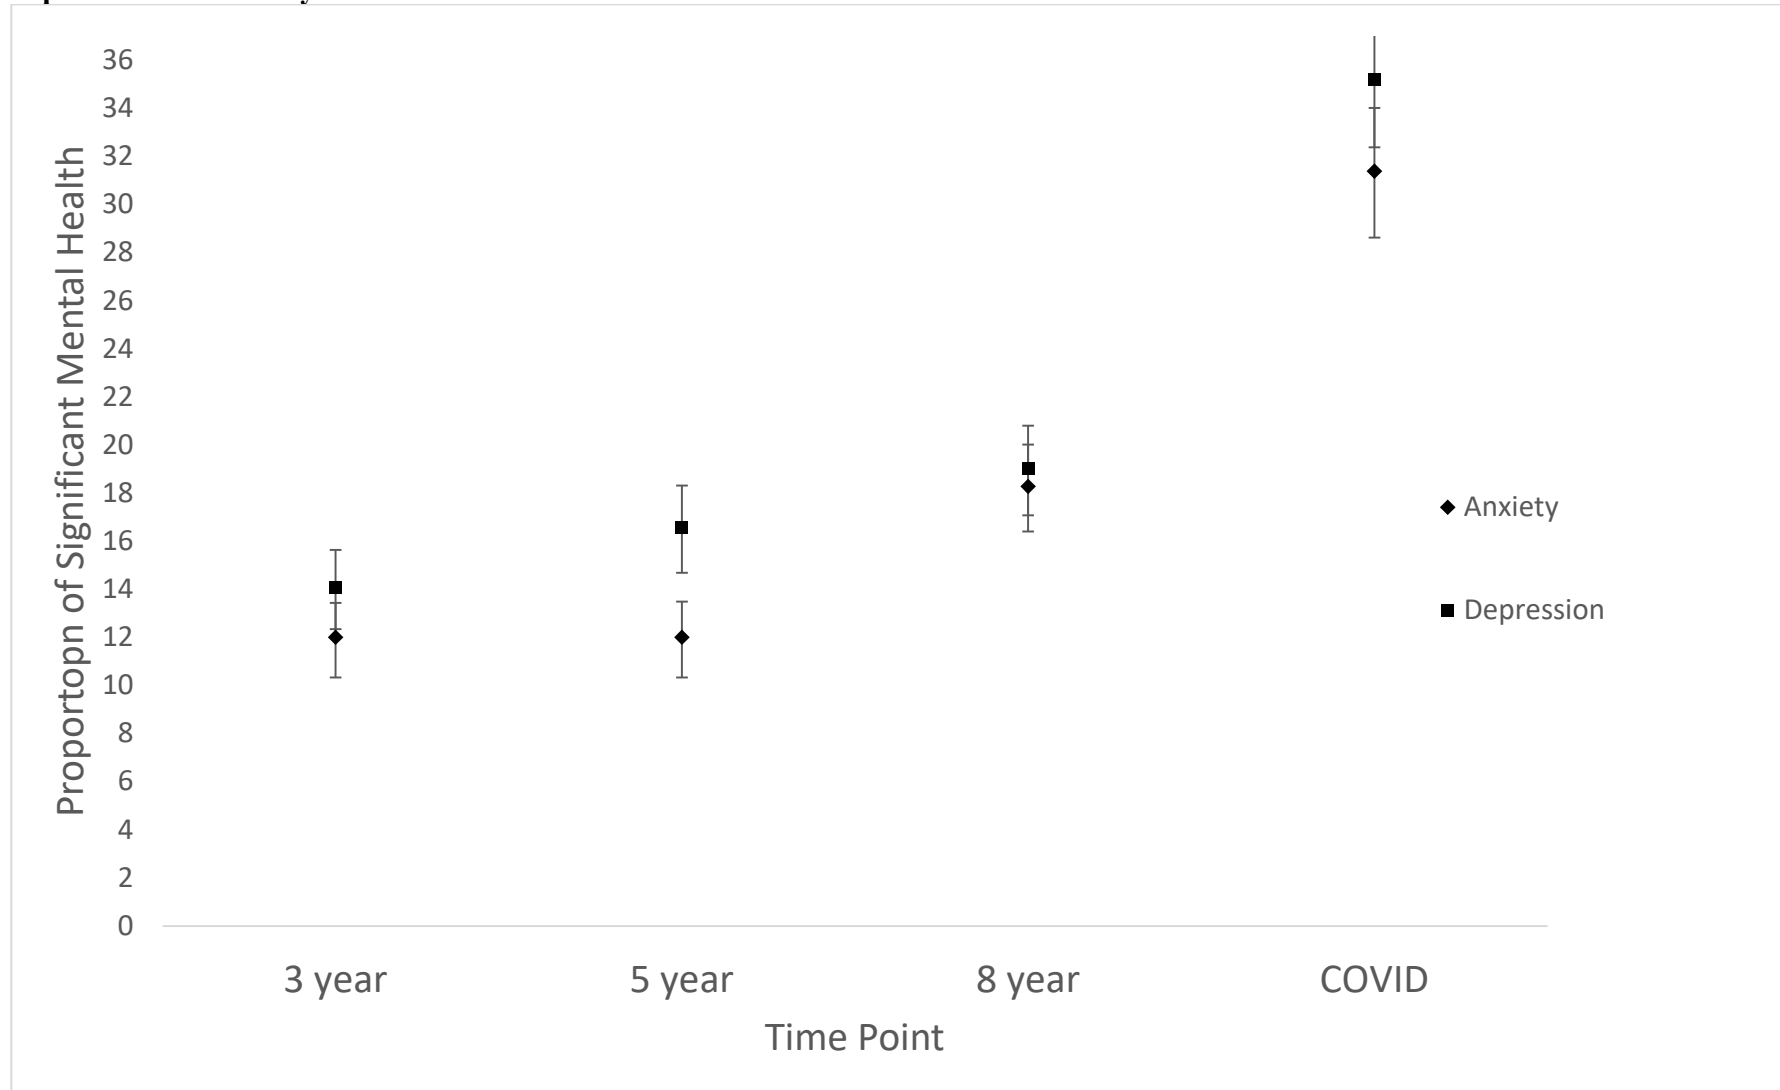

### **Comparing Difficulties Balancing Multiple Roles and Difficulties Obtaining Childcare based on the Timing of Questionnaire Completion**

#### **Differences in Difficulties Balancing Based on Response Prior to or After School Ending on June 26<sup>th</sup>, 2020**

A chi-square test was used to determine whether there was a significant difference between the proportion of mothers who had difficulty balancing roles depending on when they completed the COVID-19 wave survey (i.e., before or after the school year formally ended on June 26<sup>th</sup>, 2020). Results indicated that 78·72% (984/1250) of mothers had difficulty balancing roles prior to June 26<sup>th</sup>, 2020, whereas 70·73% (29/41) of mothers had difficulty balancing roles after June 26<sup>th</sup>, 2020. This difference was not statistically significant,  $\chi^2(1) = 1\cdot50$ ,  $p = 0\cdot22$ .

#### **Differences in Difficulties Obtaining Childcare based on Response Prior to or After School Ending on June 26<sup>th</sup>, 2020**

A chi-square test was used to determine whether there was a significant difference between the proportion of mothers who had difficulty obtaining childcare depending on when they completed the COVID-19 wave survey (i.e., before or after the school year formally ended on June 26<sup>th</sup>, 2020). Results indicated that 25·02% (312/1247) of mothers had difficulty obtaining childcare prior to June 26<sup>th</sup>, 2020, whereas 30·0% (12/40) of mothers had difficulty obtaining childcare after June 26<sup>th</sup>, 2020. This difference was not statistically significant,  $\chi^2(1) = 0\cdot51$ ,  $p = 0\cdot48$ .

#### **Differences in Difficulties Balancing Roles Based on Response Prior to or After Entering Phase 2 of Re-Opening on June 12<sup>th</sup>, 2021**

A chi-square test was used to determine whether there was a significant difference between the proportion of mothers who had difficulty balancing roles depending on when they completed the COVID-19 wave survey (i.e., before or after the province entered Phase 2 of re-opening on June 12<sup>th</sup>, 2020). Results indicated that 77·99% (847/1086) of mothers had difficulty balancing roles prior to June 12<sup>th</sup>, 2020, whereas 80·98% (166/205) of mothers had difficulty balancing roles after June 12<sup>th</sup>, 2020. This difference was not statistically significant,  $\chi^2(1) = 0\cdot91$ ,  $p = 0\cdot34$ .

#### **Differences in Difficulties Obtaining Childcare based on Response Prior to or After Entering Phase 2 of Re-Opening on June 12<sup>th</sup>, 2020**

A chi-square test was used to determine whether there was a significant difference between the proportion of mothers who had difficulty obtaining childcare depending on when they completed the COVID-19 wave survey (i.e., before or after the province entered Phase 2 of re-opening on June 12<sup>th</sup>, 2020). Results indicated that 24·75% (268/1083) of mothers had difficulty obtaining childcare prior to June 12<sup>th</sup>, 2020, whereas 27·45% (56/204) of mothers had difficulty obtaining childcare after June 12<sup>th</sup>, 2020. This difference was not statistically significant,  $\chi^2(1) = 0\cdot67$ ,  $p = 0\cdot41$ .

### Appendix References

1. Seaman SR, White IR. Review of inverse probability weighting for dealing with missing data. *Stat Methods Med Res*. 2013;22(3):278-95.
